# Supplementary material for: Cross-Inventory Uncertainty Analysis of Fossil Fuel CO2 Emissions for Prefecture-Level Cities in Shandong Province
Source: MDPI journal article supplement (doi:10.3390/atmos13091474), 2022-09-10
Supplement: s1 [file s1]

---

# Cross-Inventory Uncertainty Analysis of Fossil Fuel CO<sub>2</sub> Emissions for Prefecture-Level Cities in Shandong Province

Mengchu Tao <sup>1,2</sup>, Zhaonan Cai <sup>1,2,\*</sup>, Ke Che <sup>1,2,3</sup>, Yi Liu <sup>1,2,3</sup>, Dongxu Yang <sup>1,2</sup>, Lin Wu <sup>1</sup>, Pucai Wang <sup>1,2,3</sup> and Mingzhu Yang <sup>4</sup>

Information about industrial emissions from involved inventories

## 1. EDGAR

References: [1, 2]

Main category of industrial emission sectors: Energy comprises the production, handling, transmission and combustion of fossil fuels and biofuels. Industrial Processes refer to non-combustion emissions from either manufacturing of cement, lime, soda ash, carbides, ammonia, methanol, ethylene, methanol, adipic acid, nitric acid, caprolactam, glyoxal and other chemicals, or from production of metals and from the use of soda ash, limestone and dolomite, from production of ferrous and non-ferrous metals and from non-energy use of lubricants and waxes.

The industrial emission used in our study are EDGAR sector with code: ENE, IND, REF\_TRF, PRO, CHE, IRO, NEU, NFE, NMM. The rest sectors are considered as non-industrial emissions.

Source data of industrial emission: The fossil fuels and bio fuels are calculated with national-level energy statistics. The emission estimates use the volume of industrial product produced (and traded) from the industry statistics.

## 2. PKU-CO<sub>2</sub>

References: [3, 4] & Online Table2 (<http://inventory.pku.edu.cn/Table%202.pdf>)

Industrial emission sectors: PKU-CO<sub>2</sub> were constructed around 64 fuel sub-types in 5 categories and 6 sectors. Due to differences in data sources and data processing methods, the 64 fuel subtypes were further classified into 8 group. We used the sum of “energy production” and “industry” sectors from official website to represent the industrial emissions. The other sectors, including “transportation”, “residential and commercial”, “agriculture”, “deforestation & wildfire” are considered as non-industrial emissions.

Source of data: Fuel consumptions in China were determined based on the provincial fuel consumption and a set of provincial-data-based regression models[5]. Fuel consumptions by 26 239 major power stations from the CARMA v2.0 list.

## 3. MEIC

References: [6, 7]

Industrial emission sectors: MEIC provides CO<sub>2</sub> emissions from power, industry, transportation and residential sectors. Here we use the sum of power and industry sectors as industrial emissions.

Source of data: This inventory is constructed from a unit-based database compiled in this study, named the China coal-fired Power plant Emissions Database (CPED), which includes detailed information on the technologies, activity data, operation situation, emission factors, and locations of individual units.

## 4. CHRED

References:[8]

Industrial emission sectors: We use the sum of “industrial energy” and “industrial process” as the industrial emissions.

Source of data:

---

---

The enterprise-level point-source are collected to calculate the industrial emissions, which includes about 1.5 million industrial facilities, 2000 landfills and 4000 wastewater treatment plants.

1. Crippa, M., et al., *High resolution temporal profiles in the Emissions Database for Global Atmospheric Research*. Scientific Data, 2020. **7**(1): p. 121.
2. Janssens-Maenhout, G., et al., *EDGAR v4.3.2 Global Atlas of the three major greenhouse gas emissions for the period 1970–2012*. 2019.
3. Wang, R., et al., *High-resolution mapping of combustion processes and implications for CO<sub>2</sub> emissions*. Atmos. Chem. Phys., 2013. **13**(10): p. 5189-5203.
4. Liu, Z., et al., *Reduced carbon emission estimates from fossil fuel combustion and cement production in China*. Nature, 2015. **524**(7565): p. 335-338.
5. Zhang, Y., et al., *Emission of polycyclic aromatic hydrocarbons in China by county*. Environ Sci Technol, 2007. **41**(3): p. 683-7.
6. Liu, F., et al., *High-resolution inventory of technologies, activities, and emissions of coal-fired power plants in China from 1990 to 2010*. Atmos. Chem. Phys., 2015. **15**(23): p. 13299-13317.
7. Liu, J., et al., *Carbon and air pollutant emissions from China's cement industry 1990–2015: trends, evolution of technologies, and drivers*. 2021. **21**: p. 1627-1647.
8. Cai, B., et al., *China high resolution emission database (CHRED) with point emission sources, gridded emission data, and supplementary socioeconomic data*. Resources, Conservation and Recycling, 2018. **129**: p. 232-239.
